# Supplementary material for: The Use of a Non-Conventional Long-Lived Gallium Radioisotope 66Ga Improves Imaging Contrast of EGFR Expression in Malignant Tumours Using DFO-ZEGFR:2377 Affibody Molecule
Source: MDPI journal article supplement (doi:10.3390/pharmaceutics13020292), 2021-02-23
Supplement: s1 [file s1]

# Supplementary Materials: The Use of a Non-Conventional Long-Lived Gallium Radioisotope $^{66}\text{Ga}$ Improves Imaging Contrast of EGFR Expression in Malignant Tumours using DFO-ZEGFR:2377 Affibody Molecule

Maryam Oroujeni, Tianqi Xu, Katherine Gagnon, Sara S. Rinne, Jan Weis, Javad Garousi, Ken G. Andersson, John Löfblom, Anna Orlova, Vladimir Tolmachev

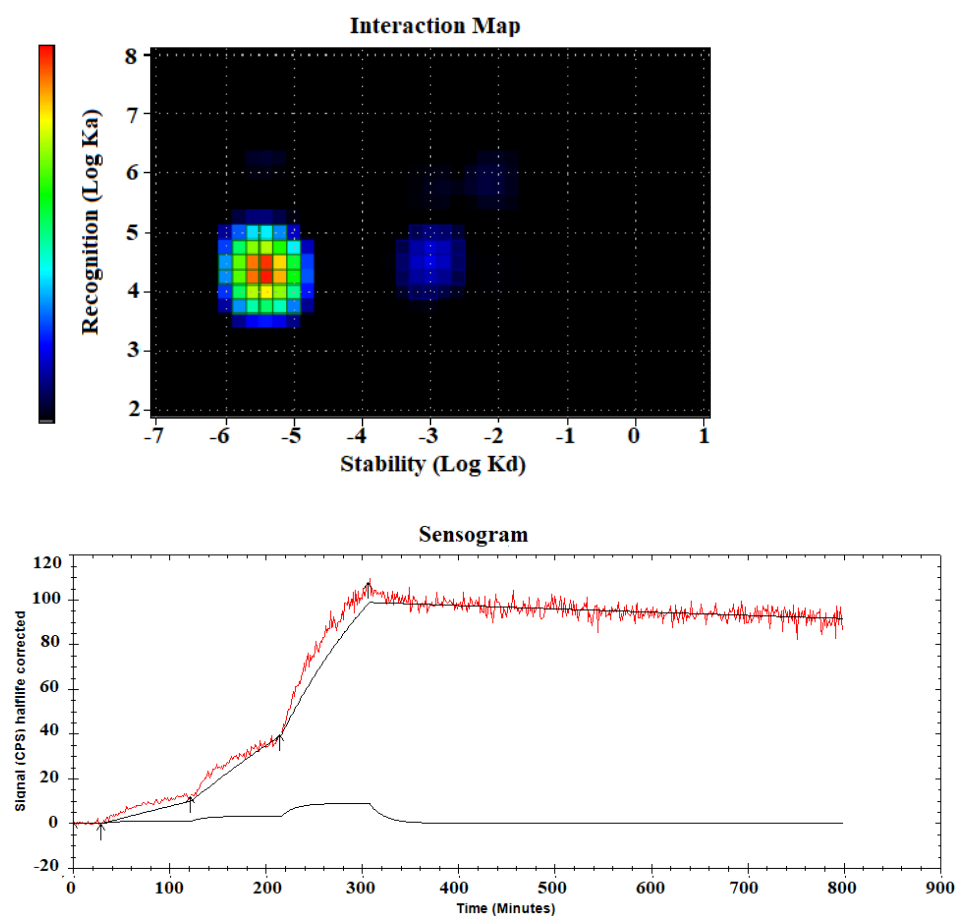

**Figure S1.** LigandTracer sensorgram and InteractionMap of  $[^{66}\text{Ga}]\text{Ga-DFO-ZEGFR:2377}$  binding to EGFR-expressing A431 cells. Input data were obtained from LigandTracer measurement of cell-bound activity during association of labelled conjugate to- and dissociation from A431 cells. Binding was measured at three different concentrations: 0.33, 1, and 3 nM. Measurement was performed in duplicates.

**Table S1.** Long-lived positron-emitting radiometals. Data are taken from [51]. Emitted gamma-quanta with abundance over 5% are shown.

| Nuclide          | Half-life, hour | Mode of decay                            | Principal photon emissions, keV (abundance in %)                                                                                |
|------------------|-----------------|------------------------------------------|---------------------------------------------------------------------------------------------------------------------------------|
| <sup>55</sup> Co | 17.5            | $\beta^+$ 76 %<br>EC 24 %                | <b>511(152%)</b> , 477(20.2 %), 931(75 %), 1317(7.1%), 1408(16.9%)                                                              |
| <sup>64</sup> Cu | 12.7            | $\beta^+$ 18<br>$\beta^-$ 37%<br>EC 24 % | <b>511(36%)</b> , 1346(0.5%),                                                                                                   |
| <sup>66</sup> Ga | 9.49            | $\beta^+$ 56.5 %,<br>EC 43.5%            | <b>511 (113%)</b> , 834 (5.9%), 1039 (37%), 2190 (5.3%), 2751 (22.7%)                                                           |
| <sup>86</sup> Y  | 14.7            | $\beta^+$ 33 %<br>EC 67 %                | <b>511(66%)</b> , 443(16.9%), 628(32.6%), 646(9.2%), 703(15.4%), 778(22.4%), 1077(82.5%), 1153(30.5%), 1854(17.2%), 1920(20.8%) |
| <sup>89</sup> Zr | 78.4            | $\beta^+$ 23%<br>EC 77%                  | <b>511(46%)</b> , 909(100%)                                                                                                     |
